# Supplementary material for: Teaching Evolution Using Semester-Long Student Investigations of Adaptation by Natural Selection
Source: Oxford University Press journal article supplement (doi:10.1525/abt.2023.85.2.66), 2023-02-01
Supplement: s1_5_criteria_to_test_adaptation_hypothesis.doc [file s1_5_criteria_to_test_adaptation_hypothesis.doc]

**Supplemental File 1: 5 Criterial to Test Adaptation Hypothesis**

**Tests of Hypotheses of Adaptation**

**Adaptation:** a feature of an organism (that arose by natural selection) enabling the organism to survive and reproduce in its natural environment better than if it lacked the feature.

To show that a trait is an adaptation you need to show that it provides a fitness advantage to the organism and that it arose by natural selection for the stated purpose that provides the fitness advantage.

**Natural Selection:** The process by which the forms of organisms in a population that are best adapted to the environment increase in frequency relative to less well adapted forms over a number of generations. For a trait to evolve by natural selection 1) it must be variable among individuals, 2) certain variants have higher reproductive success, and 3) it must be heritable.

**Fitness**: Life-time reproductive success.

**Five major criteria for determining if something is an adaptation:**

**1) Ecological/Biological Function of trait**: Need to be able to show that having the trait gives an ecological/biological advantage. Some evidence for how the trait actually functions in the environment. This is the mechanistic link to 2 below. The problem with this in many studies has been that the actual function has been assumed and later, more careful study has revealed that the trait was actually functioning in a way that was rather different than assumed.

**2) Evidence Selection Has Occurred (Fitness)**: Need to show that there is an advantage to an individual’s lifetime reproductive success from having a variant of the trait in the environment in question. Historically – has one type replaced another? Can selection be observed when novel phenotypes are put in the selective environment. How does the trait impact fitness?

**3) Phylogenetic History of Trait**: What evolved from what? Is this a “new” trait or is it something that was just passed down intact from the ancestor of that species and therefore doesn’t represent a response to selection but is actually a trait that was already there. A simplistic example would be trying to figure out the adaptive significance for the presence of hair in humans. While certain features of hair may be adaptive the actual presence of hair was inherited and the presence of hair is not a new trait that was selected for through the process of natural selection. In fact most traits are really slight modifications of pre-existing traits found in the ancestor. In that sense we describe natural selection as a process that tinkers with the traits that are already there. For this criteria you need to find the most recent common ancestor and see if you can identify the trait or the precursor to the trait in that group.

**4) Structure of Population from genetic and selective perspective that would allow for development of trait through selection:** Gene flow patterns and patterns of selective environments. For example if there is selection for a trait in a local region (a given environment exerts a particular selection pressure different from what the rest of the population experiences), the trait may still not change if there are large amounts of individuals moving into the area and breeding. They would bring in genes from outside the area where selection is operating that would swamp out any genetic changes in the local population.

**5) Heritability of Trait**: Need to show that the parents passed the trait on and it did not develop due to environmental effects. Parent-offspring regressions. Need to show that the trait could respond to selection. Variation in a trait has many underpinnings, environmental, additive genetic variation, dominant genetic variation, and genetic interactions – epistatic effects and so on. Could not have selection operate if there is no additive genetic variation for the trait. A difficulty with this is that strong selection may have fixed all the additive genetic variation. However, it will still be interesting to try to see how much variation has a genetic basis.
