# Supplementary material for: Teaching Evolution Using Semester-Long Student Investigations of Adaptation by Natural Selection
Source: Oxford University Press journal article supplement (doi:10.1525/abt.2023.85.2.66), 2023-02-01
Supplement: s4_article_annotation_worksheet.docx [file s4_article_annotation_worksheet.docx]

**Supplemental Material File 4: Article annotation worksheet**

**Annotations**

After getting your topic, you will want to read extensively on it. This will provide you with the necessary background to consider whether the particular trait is an evolutionary adaptation. As part of that background reading, you will annotate readings so that you can share resources within the group. The annotations should facilitate organizing your presentations and paper. Each member of the team must submit at least 3 unique annotations but you will probably complete closer to approximately 7-8. This should mean that your group will accumulate a broad array of background sources.

The annotations you submit must be on published scholarly material that is **directly relevant** to your topic. The process of finding relevant research often includes false positives; articles that have promise when you read the abstract but are of little real use except to broaden your understanding of the general topic. These false positives should not be annotated but may be of use in your paper.

Annotations begin with bibliographic information in HARVARD format. This is available online through http://www.citethisforme.com/harvard-referencing or http://guides.lib.monash.edu/citing-referencing/harvard . This is followed by a brief abstract (200- 300 words) of the content. It may seem difficult to summarize so briefly, but this is an important skill that helps you discern what is essential about the article. This also helps you work on your ability to communicate to others what is important about the research. Write the abstract so that other group members could read it and understand the basic idea, method, and results of the study. For articles such as book chapters that summarize previous research rather than present new evidence, write a summary of the author’s major points. You may not simply copy or reword the author’s abstract (see the syllabus under Academic Integrity). The other information that should be included with the annotation is summarized on the form I have provided. The form is a table in Microsoft Word.

**What you need to submit to the instructor….**

1. Your first three annotations on your topic are due 2 class periods before your presentation and the last annotation before the last presentation.

2. Each annotation must be typed using the form provided (or something similar).

3. A clean copy of the first page of the article must accompany each submitted annotation.

4. Each submitted annotation is worth 10 points (40 points total).

**What you should keep and share…..**

1. Keep copies of each article together with the annotation in folders or a notebook.

2. Provide each group member with a copy of each annotation.

3. Read and keep the annotations provided by other group members.

4. For annotations noting something important about the Evolution Question for which you are first author, request that the group member provide you with a copy of the article.

5. If the article appears to be critical for the group as a whole, share it so that everyone can read the original.

**Annotation**

| Your Name |  | |
| --- | --- | --- |
| Bibliographic Citation |  | |
| **Summary (200-300 words)** | | |
| **Information presented relevant to Adaptation Questions** | | |
| Trait Function | |  |
| Selection occurred | |  |
| Heritability | |  |
| Pop Genetic Development | |  |
| Phylogenetic History | |  |
| **Comments and Notes** | | |
| Comments: What is most helpful about this article | |  |
| Comments: e.g., problems or limitations etc. | |  |
| Sources cited that may be useful | |  |
